# Supplementary material for: Inhibition of Human Malignant Pleural Mesothelioma Growth by Mesenchymal Stromal Cells
Source: MDPI journal article supplement (doi:10.3390/cells10061427), 2021-06-08
Supplement: s1 [file s1]

## Supplementary Materials

1

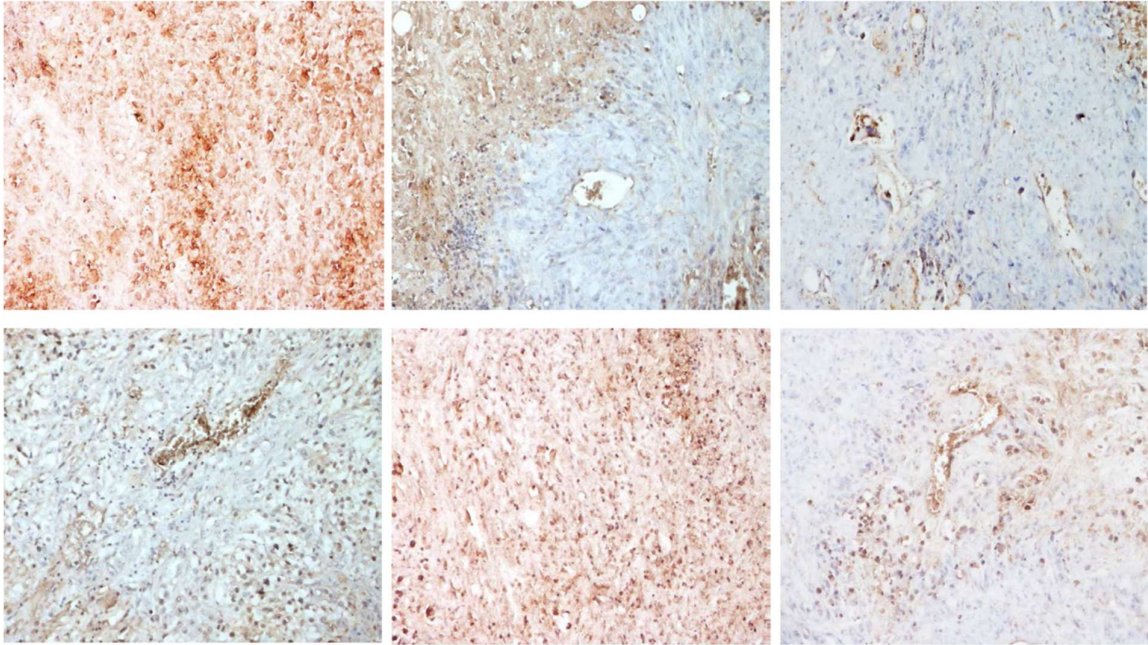

**Figure S1.** Immunostaining of the MSTO-211H tumor xenograft sections with anti-mouse CD31 antibody. Different microscopic fields (100× magnification) of MSTO-211H xenografts are shown. The pictures reported are representative of the analysis of 30 different microscopic fields.

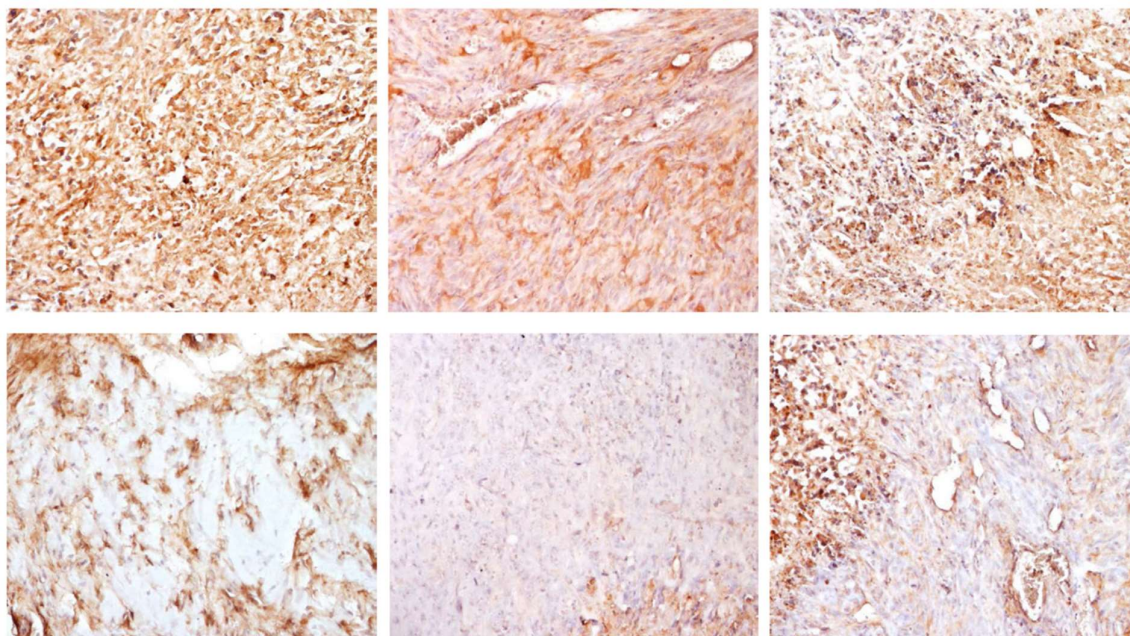

**Figure S2.** Immunostaining of the MSTO-211H-MSC tumor xenograft sections with anti-mouse CD31 antibody. Different microscopic fields (100× magnification) of MSTO-211H-MSC xenografts are shown. The pictures reported are representative of the analysis of 30 different microscopic fields.
